# Supplementary material
Source: Springer Nature journal article supplement (https://www.springermedizin.de/resource/supplementary/12943_2010_613_MOESM12_ESM.pdf/9555110)

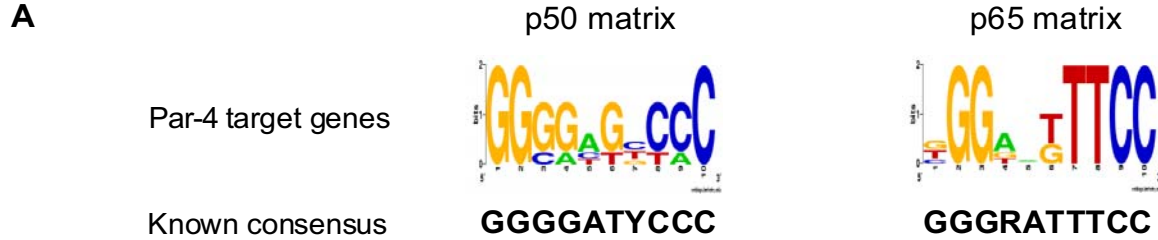

| <u>Gene</u>  | <u>p50 motif</u> | <u>p65 motif</u> |
|--------------|------------------|------------------|
| <i>MAPK1</i> | GGGGAGCCAC       | TGGTGTTC         |
| <i>CDC27</i> | None detected    | None detected    |
| <i>CDK5</i>  | GGGGTGCCCC       | TGGATTTTC        |
| <i>IGF1R</i> | GGGGCGGCC        | CGGGCTTC         |
| <i>PDCD6</i> | GGGAAGTTCC       | GGGAAGTTCC       |
| <i>TUBB</i>  | GGCGATTCCC       | GGGAAGTTCC       |

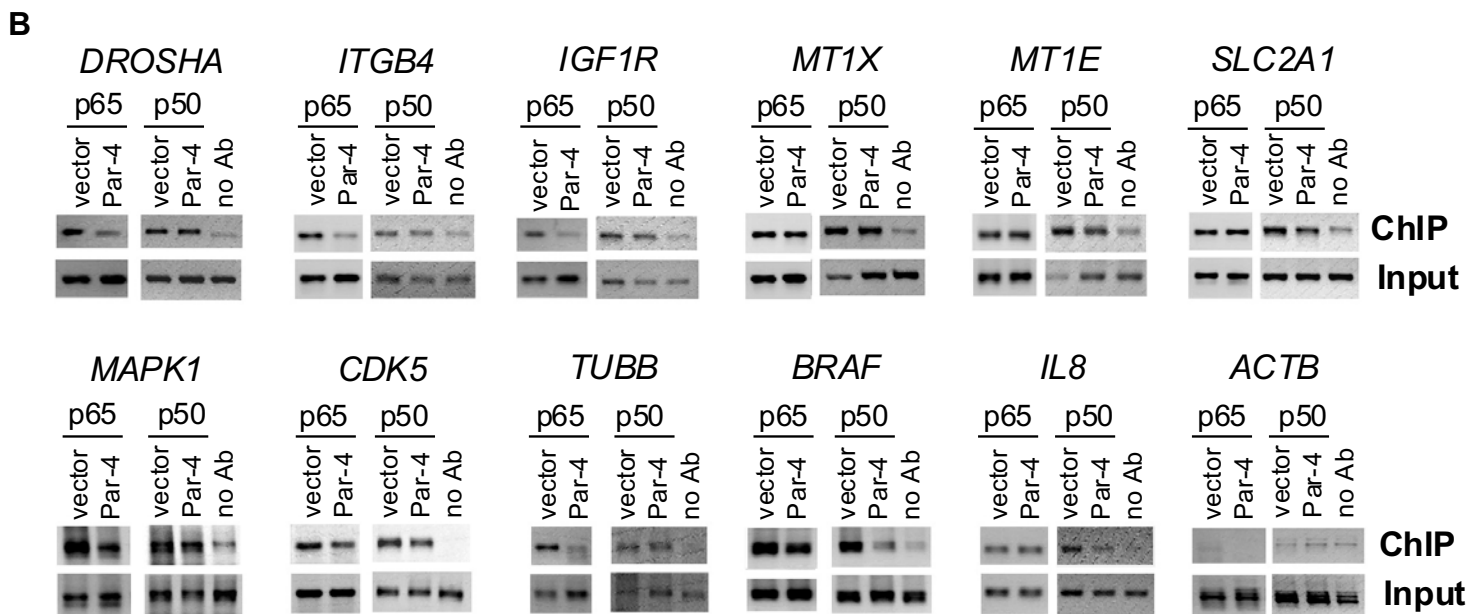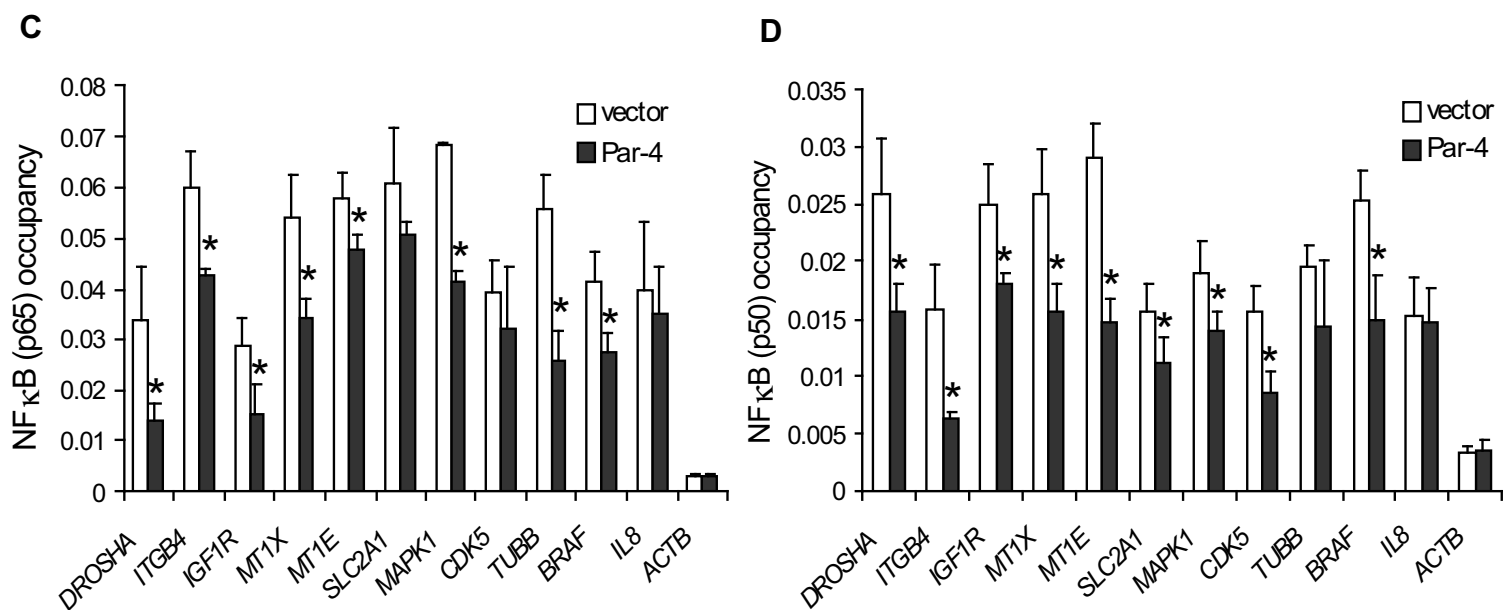

Supplement: MOESM12 [file 9555110]
